# Supplementary material for: PFKFB2 Promoter Hypomethylation as Recurrence Predictive Marker in Well-Differentiated Thyroid Carcinomas
Source: MDPI journal article supplement (doi:10.3390/ijms20061334), 2019-03-16
Supplement: s1 [file s1]

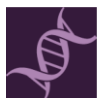

## Supplementary Materials

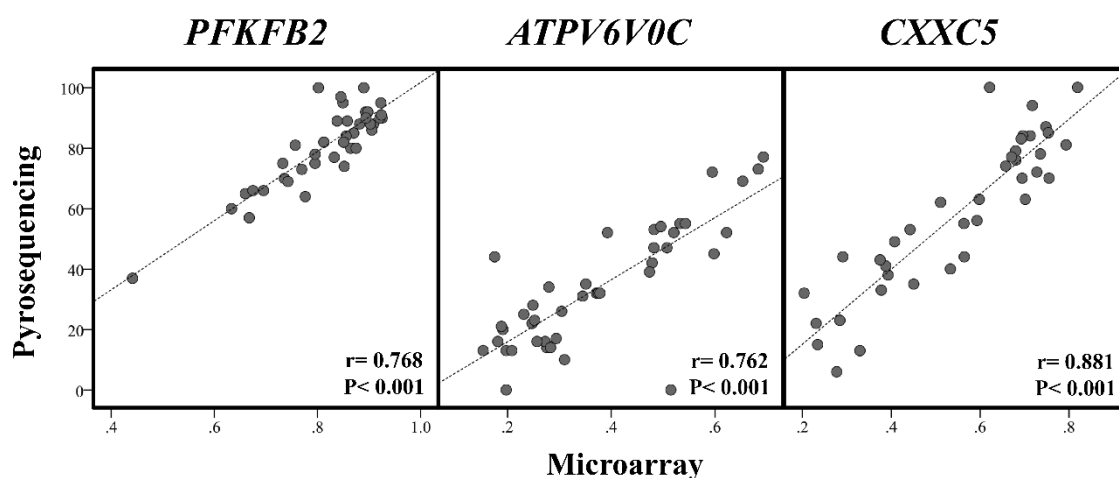

**Figure 1.** Correlation between values obtained by methylation microarray and bisulfite pyrosequencing assays. Scatterplots showing high values of positive correlation for *PFKFB2*, *ATPV6V0C* and *CXXC5*.  $r$ = correlation coefficient,  $P$ = p-value from Spearman's correlation test.

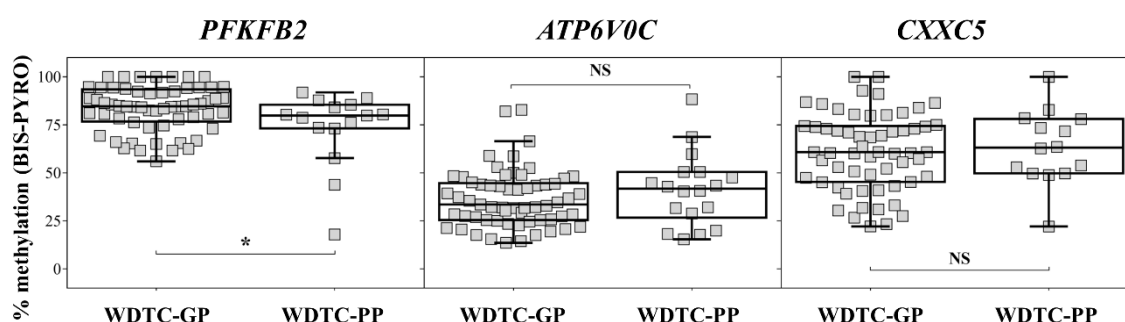

**Figure 2.** Bisulfite pyrosequencing quantification of CpG allele methylation mapped in *PFKFB2*, *CXXC5* and *ATPV6V0* in well-differentiated thyroid carcinomas (microarray-independent cases). The CpGs methylation levels in WDTC-PP patients were compared with WDTC-GP. BIS-PYRO: bisulfite pyrosequencing; NS> 0.05; \* $P$ < 0.05 (Mann-Whitney test); WDTC-GP: well-differentiated thyroid carcinomas of good prognosis; WDTC-PP: well-differentiated thyroid carcinomas of poor prognosis.

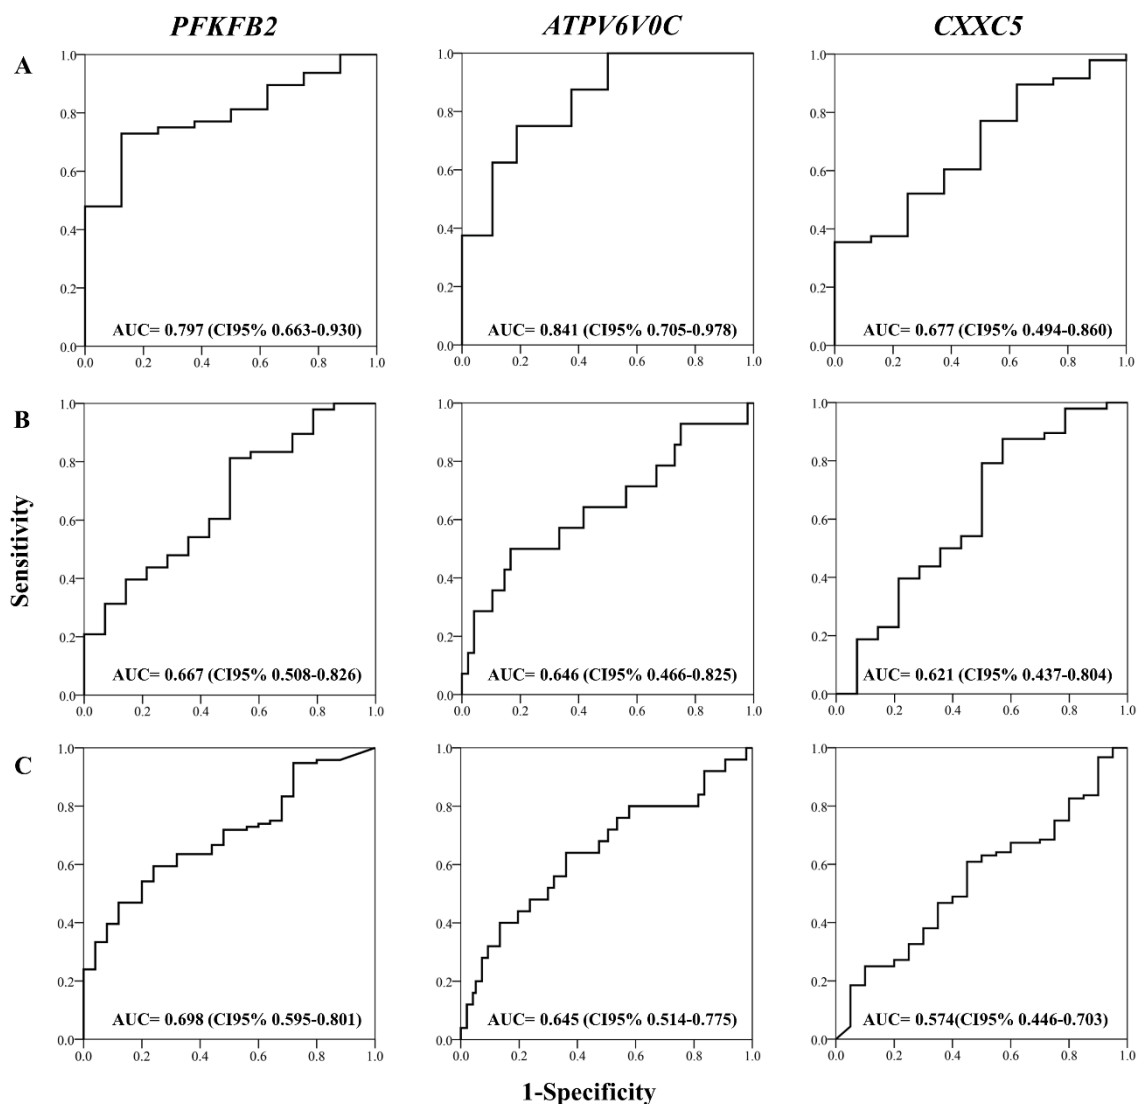

**Figure 3.** (A). Area under the ROC curve of the epigenetic candidate markers to identify aggressive subtypes of WDTC samples previously evaluated by methylation microarray (BISARRO DOS REIS et al., 2017); (B) TCGA cohort of PTC and (C) cases evaluated by bisulfite pyrosequencing. CI<sub>95%</sub>: 95% confidence interval; AUC: area under the receiver operating characteristic (ROC) curve.

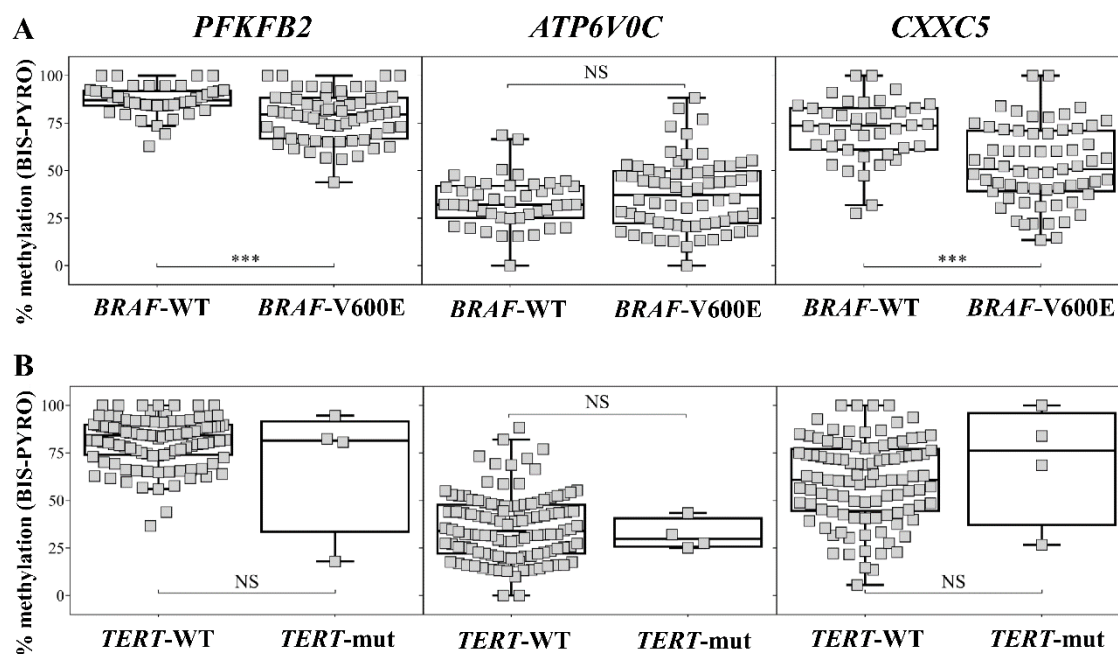

**Figure 4.** DNA methylation in *PFKFB2*, *ATP6B0C* and *CXXC5* according to *BRAF* (V600E) and *TERT* (C228T and C250T) mutation status. BIS-PYRO: bisulfite pyrosequencing; NS> 0.05; \*\*\* $P < 0.001$  (Mann-Whitney test).

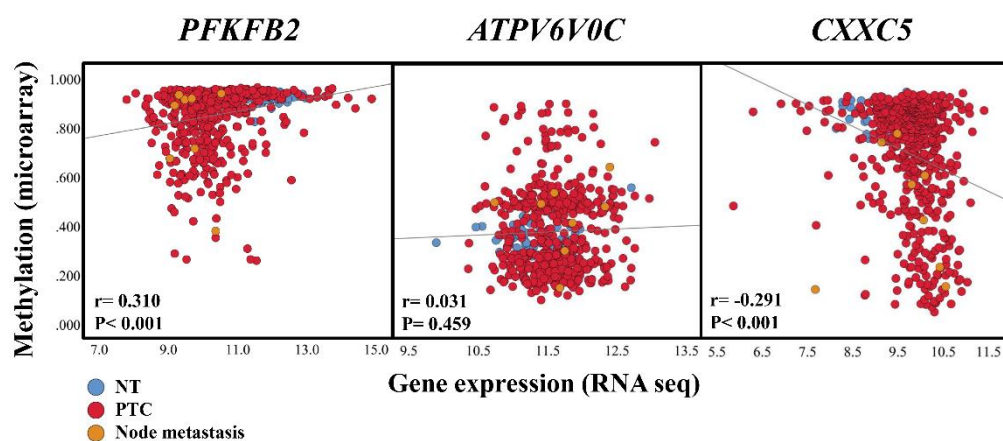

**Figure 5.** Correlation between CpG methylation and gene expression levels of the studied genes in the thyroid cohort from TCGA database. A positive correlation was observed between DNA methylation (probe cg02710090) and *PFKFB2* expression and negative correlation between DNA methylation (probe cg19628988) and *CXXC5*. No correlation was noted to *ATP6V0C* (methylation probe cg05884711).  $r$ = correlation coefficient,  $P$ = p-value from Spearman's correlation test. NT: non-neoplastic thyroid; PTC: papillary thyroid carcinoma.
