# Supplementary material for: PFKFB2 Promoter Hypomethylation as Recurrence Predictive Marker in Well-Differentiated Thyroid Carcinomas
Source: Int J Mol Sci. 2019 Mar 16;20(6):1334. doi: 10.3390/ijms20061334 (PMC6471408; doi:10.3390/ijms20061334)
Supplement: Supplementary file 1 [file ijms-20-01334-s001.zip › Supplementary Table 1.xlsx]

## Sheet: Tab S1
	Table S1. Individualized clinical pathological and molecular characterization of the WDTC patients included in the study.
	Sample ID	Microarray independent	Relapse	RFS follow-up (months)	Age (years)	Multicentricity	ATA risk class#	Staging	Histology	PFKFB2*	ATP6V0C*	CXXC5*	BRAF mutation	TERT mutation
	312	no	no	140.262	<55	No	Low	pT1N0M0	PTC-follicular variant	100	66.48	86.47	WT	WT
	313	no	no	173.639	<55	No	Low	pT1N0M0	PTC-follicular variant	100	42.09	100	WT	WT
	315	yes	no	158.721	<55	No	Intermediate	pT1N1AM0	PTC-classic variant	87.73	31.43	71.91	WT	WT
	316	yes	no	132.656	<55	Yes	Low	pT1N0M0	PTC-mucinous variant	88.45	12.92	40.86	V600E	WT
	318	yes	no	183.639	<55	Yes	Intermediate	pT1N1AM0	PTC-classic variant	84.07	47	31.78	V600E	WT
	320	yes	no	176.361	≥55	No	Intermediate	pT3N1AM0	PTC-diffuse sclerosing variant	77.5	27.53	33.33	V600E	WT
	321	no	yes	106.164	<55	Yes	Intermediate	pT3N0M0	PTC-classic variant	NA	59.83	53.93	V600E	WT
	323	no	no	163.672	<55	Yes	Low	pT1N0M0	PTC-classic variant	94.48	32.87	43.25	V600E	NA
	327	no	no	174.689	<55	No	Low	pT2N0M0	PTC-classic variant	69.38	25.81	60.39	V600E	WT
	331	no	no	169.967	≥55	Yes	Intermediate	pT3N0M0	PTC-follicular variant	94.86	17.67	92.83	WT	WT
	333	yes	no	122.459	<55	Yes	Intermediate	pT3N1BM0	PTC-follicular variant	91.92	16.04	22.84	V600E	WT
	338	yes	no	156.59	<55	No	Low	pT1N0M0	PTC-classic variant	70.15	34.21	14.7	V600E	WT
	339	yes	no	156.689	<55	No	Intermediate	pT1N1AM0	PTC-classic variant	74.82	22.13	52.54	V600E	WT
	340	no	no	136.82	<55	Yes	Low	pT1N0M0	PTC-classic variant	83.48	49.04	63.81	V600E	WT
	342	no	no	158.066	<55	No	Intermediate	pT3N1AM0	PTC-classic variant	100	35.5	40.65	V600E	WT
	343	yes	no	98.9508	≥55	No	Low	pT1N0M0	PTC-follicular variant	86.15	24.8	81.2	WT	WT
	344	yes	no	128.033	<55	No	Intermediate	pT3N0M0	PTC-classic variant	89.55	13.21	43.56	V600E	WT
	345	no	yes	23.4098	<55	Yes	Intermediate	pT3N1BM0	PTC-classic variant	84.14	50.49	62.78	WT	WT
	346	yes	no	123.377	<55	No	Intermediate	pT3N0M0	PTC-follicular variant	88.29	22.8	21.69	V600E	WT
	347	yes	no	90.1639	≥55	Yes	Low	pT1N0M0	PTC-oncocytic variant	94.81	32.22	84.35	WT	WT
	348	yes	no	135.639	<55	No	Intermediate	pT3N0M0	PTC-classic variant	88.54	13.23	69.59	V600E	WT
	349	no	no	132.393	<55	No	Low	pT1N0M0	PTC-classic variant	84.63	32.2	68.86	WT	WT
	350	yes	no	136.033	<55	Yes	Low	pT1N0M0	PTC-classic variant	79.58	54.39	100	V600E	WT
	351	no	no	161.41	<55	No	Intermediate	pT2N1AM0	PTC-classic variant	56	49.05	45.15	V600E	WT
	353	no	no	146.787	<55	No	Low	pT1N0M0	PTC-follicular variant	92.41	27.45	80.16	WT	WT
	360	yes	no	151.115	<55	No	Intermediate	pT3N0M0	PTC-classic variant	72.66	69.28	55.09	V600E	WT
	361	yes	no	100.033	<55	No	Low	pT2N0M0	PTC-classic variant	100	52.41	13.47	V600E	WT
	362	no	no	150.656	<55	Yes	Low	pT1N0M0	PTC-diffuse sclerosing variant	88.7	41.23	73.87	WT	WT
	365	yes	no	145.115	<55	No	Low	pT1N0M0	PTC-classic variant	90.06	41.79	84.95	WT	WT
	366	yes	no	123.574	<55	Yes	Intermediate	pT1N1AM0	PTC-tall cell variant	63.95	25.54	42.6	V600E	WT
	368	no	no	69.3115	≥55	Yes	Low	pT1N0M0	PTC-classic variant	100	39.01	60.81	V600E	WT
	371	yes	no	131.836	<55	No	Intermediate	pT1N1BM0	PTC-classic variant	NA	34.99	62.06	WT	WT
	373	yes	no	114.131	<55	Yes	Intermediate	pT2N1AM0	PTC-classic variant	59.69	52.5	35.47	V600E	WT
	376	no	yes	102.23	<55	Yes	Intermediate	pT3N0M0	PTC-classic variant	87.81	31.72	78.5	V600E	WT
	377	no	no	140.033	≥55	No	Low	pT1N0M0	PTC-follicular variant	100	48.37	45.27	V600E	WT
	381	yes	no	121.705	<55	No	Low	pT1N0M0	PTC-classic variant	81.91	39.22	78.96	WT	WT
	382	yes	no	130.984	<55	No	Low	pT1N0M0	PTC-classic variant	91.89	31.89	77.43	WT	WT
	384	yes	no	134.787	<55	No	Intermediate	pT3N0M0	PTC-classic variant	69.31	20.7	82.96	WT	WT
	393	no	yes	26.0656	<55	Yes	Intermediate	pT1N1AM0	PTC-classic variant	88.95	40.44	73.41	WT	WT
	394	no	no	128.852	<55	No	Intermediate	pT3N0M0	PTC-classic variant	86.07	36.8	74.18	WT	WT
	399	no	no	125.41	<55	Yes	Intermediate	pT3N1BM0	PTC-solid variant	100	37.34	57.27	WT	WT
	400	yes	no	65.8689	≥55	No	Low	pT1N0M0	PTC-classic variant	NA	0	NA	V600E	WT
	401	no	no	114.328	<55	Yes	Low	pT1N0M0	PTC-classic variant	91.84	32.01	58.47	WT	WT
	402	no	no	140.23	<55	No	Intermediate	pT1N1AM0	PTC-classic variant	88.2	39.35	60.92	WT	WT
	403	no	no	87.7705	<55	No	Low	pT1N0M0	PTC-classic variant	73.57	17.62	49.09	V600E	WT
	406	no	no	132.426	<55	Yes	Low	pT1N0M0	PTC-classic variant	94.4	82.86	50.83	V600E	NA
	407	yes	yes	16.9836	<55	No	Low	pT1N0M0	PTC-classic variant	56.78	73.29	37.56	V600E	WT
	408	no	no	77.9016	≥55	No	Intermediate	pT3N0M0	PTC-diffuse sclerosing variant	81.41	58.87	60.85	V600E	WT
	409	no	no	127.246	≥55	No	High	pT4N0M0	PTC-classic variant	82.41	43.41	83.95	V600E	C228T
	410	no	yes	19.2459	<55	Yes	Low	pT1N0M0	PTC-follicular variant	79.9	42.84	82.84	WT	WT
	411	no	no	129.508	<55	Yes	Low	pT3N0M0	PTC-follicular variant	94.77	43.97	91.18	WT	WT
	412	no	no	111.705	≥55	No	Intermediate	pT3N0M0	PTC-classic variant	85.61	41.38	60.2	V600E	WT
	413	no	no	82.9508	<55	No	Low	pT1N0M0	PTC-diffuse sclerosing variant	92.5	47.87	86.89	WT	WT
	414	no	no	133.475	≥55	Yes	Low	pT1N0M0	PTC-classic variant	61.68	24.68	52.22	V600E	WT
	415	no	no	131.869	<55	No	Intermediate	pT2N1AM0	PTC-solid variant	85.63	43.49	53.03	WT	WT
	416	yes	no	97.7049	<55	No	Intermediate	pT3N0M0	PTC-classic variant	NA	16.06	NA	V600E	WT
	419	no	no	120.426	<55	Yes	Intermediate	pT3N0M0	PTC-classic variant	87.49	20.55	40.98	V600E	WT
	420	no	no	121.311	<55	No	Intermediate	pT1N1AM0	PTC-classic variant	66.12	43.95	48.1	V600E	WT
	421	no	no	114.623	<55	No	Low	pT1N0M0	PTC-follicular variant	93.84	21.97	81.38	V600E	WT
	422	no	no	124.885	<55	No	Intermediate	pT3N0M0	PTC-classic variant	77.98	34.7	60.32	V600E	WT
	423	no	yes	60.2951	<55	Yes	Intermediate	pT3N1AM0	PTC-classic variant	73.58	19.95	49.69	WT	WT
	424	no	no	131.082	<55	Yes	Intermediate	pT3N0M0	PTC-classic variant	76.39	45.12	56.54	V600E	WT
	425	no	no	70.0656	<55	No	Intermediate	pT3N1AM0	PTC-classic variant	78.39	31.68	31.02	V600E	WT
	426	no	no	133.082	≥55	No	Low	pT1N0M0	PTC-classic variant	81.08	44.34	55.63	V600E	WT
	428	no	no	133.803	<55	Yes	Intermediate	pT3N1AM0	PTC-classic variant	88.94	30.36	72.07	V600E	WT
	430	no	no	128.984	<55	Yes	Low	pT1N0M0	PTC-follicular variant	94.65	25.09	68.6	WT	C250T
	432	no	no	127.705	<55	No	Low	pT1N0M0	PTC-follicular variant	66.83	14.48	33.15	V600E	WT
	433	no	no	128.033	<55	No	Low	pT1N0M0	PTC-classic variant	62.58	21.28	22.14	V600E	WT
	435	no	no	114	<55	No	Intermediate	pT3N0M0	PTC-classic variant	65.11	47.17	73.04	V600E	WT
	436	no	yes	57.6393	<55	Yes	Low	pT1N0M0	PTC-classic variant	76.22	28.93	52.94	WT	WT
	437	no	no	120.262	<55	Yes	Low	pT1N0M0	PTC-classic variant	80.79	28.47	27.59	WT	WT
	440	no	no	114.033	<55	No	Intermediate	pT3N1AM0	PTC-classic variant	84.46	29.32	31.83	WT	WT
	441	no	yes	62.0656	<55	Yes	Intermediate	pT1N1AM0	PTC-classic variant	NA	88.35	NA	V600E	WT
	442	no	no	76.9508	<55	No	Intermediate	pT3N1AM0	PTC-classic variant	65.35	48.22	83.29	V600E	WT
	443	no	no	107.475	<55	No	Intermediate	pT1N1AM0	PTC-classic variant	94.21	53.06	42.36	V600E	WT
	446	no	no	124.098	<55	Yes	Low	pT1N0M0	PTC-classic variant	84.46	25.46	74.44	WT	WT
	448	no	no	117.279	<55	No	Intermediate	pT3N0M0	PTC-follicular variant	79.03	28.45	75.03	V600E	WT
	450	no	no	115.803	<55	No	Low	pT1N0M0	PTC-classic variant	84.26	43.11	47.46	WT	WT
	460	no	yes	82.0984	<55	No	Intermediate	pT3N1AM0	PTC-classic variant	80.38	50.49	NA	V600E	WT
	462	yes	yes	1.08197	<55	No	Intermediate	pT3N1AM0	PTC-classic variant	84.98	32.23	55.68	WT	WT
	464	no	no	115.738	<55	Yes	Low	pT1N0M0	PTC-classic variant	94.53	25.41	39.22	V600E	WT
	466	no	no	108.131	<55	No	Intermediate	pT2N1M0	PTC-classic variant	84.75	27.06	80.52	WT	WT
	467	yes	yes	5.04918	<55	No	Low	pT1N0M0	PTC-classic variant	75.04	55.37	39.89	V600E	WT
	469	no	no	119.738	≥55	Yes	Low	pT2N0M0	PTC-follicular variant	62.82	15.56	85.88	WT	WT
	470	no	no	118.754	<55	No	Intermediate	pT2N1AM0	PTC-classic variant	65.57	50.04	69.44	V600E	WT
	473	yes	no	93.4098	<55	Yes	Intermediate	pT3N1AM0	PTC-follicular variant	79.57	16.08	62.93	WT	WT
	484	no	no	107.016	<55	No	Intermediate	pT3N0M0	PTC-classic variant	84.57	20.74	71.06	V600E	WT
	492	no	no	113.508	<55	No	Low	pT3N0M0	PTC-classic variant	91.38	19.5	100	WT	WT
	495	no	yes	10.1639	<55	Yes	Intermediate	pT3N1AM0	PTC-classic variant	80.52	43.44	71.67	V600E	WT
	506	yes	yes	93.6393	<55	No	High	pT4AN1AM0	PTC-classic variant	81.42	9.89	NA	V600E	WT
	507	yes	no	75.3115	<55	Yes	Intermediate	pT3N0M0	PTC-classic variant	89.02	19.75	69.6	WT	WT
	508	no	no	65.7377	≥55	No	Intermediate	pT3N0M0	PTC-classic variant	80.69	27.59	26.73	V600E	C250T
	511	no	no	128.656	≥55	No	Intermediate	pT3N0M0	PTC-classic variant	84.96	58.68	60.06	V600E	WT
	512	no	no	133.475	<55	Yes	Intermediate	pT3N1AM0	PTC-classic variant	89.02	52.56	30.43	V600E	WT
	516	yes	yes	32.6885	<55	No	Low	pT1N0M0	PTC-classic variant	81.65	55.03	44.24	V600E	WT
	518	no	yes	7.44262	<55	Yes	Intermediate	pT1N1AM0	PTC-follicular variant	91.9	15.44	NA	WT	WT
	521	no	yes	13.4098	<55	Yes	Intermediate	pT3N1AM0	PTC-classic variant	57.73	17.83	49.8	V600E	WT
	522	no	yes	18.2623	<55	Yes	Intermediate	pT3N1AM0	PTC-classic variant	43.93	18.25	22.1	V600E	WT
	534	yes	yes	5.18033	≥55	No	Intermediate	pT2N1BM0	PTC-classic variant	65.77	77	76.45	V600E	WT
	535	no	yes	17.5738	<55	No	Intermediate	pT1N1AM0	PTC-classic variant	85.52	47.61	63.59	WT	WT
	540	yes	no	126.262	<55	No	Low	pT1N0M0	miFTC	95.26	16.9	87.41	NA	WT
	541	yes	no	139.541	<55	No	Intermediate	pT1N0M0	FTC	97.34	13.53	93.73	NA	WT
	542	no	yes	97.2459	<55	No	Intermediate	pT1N0M0	HCC	17.97	32.09	100	NA	C250T
	543	yes	no	130.197	<55	No	Intermediate	pT1N0M0	FTC	64.85	72.07	48.58	NA	WT
	548	no	no	81.4754	<55	No	Low	pT2N0M0	miFTC	82.58	82.07	73	NA	WT
	549	yes	no	123.377	<55	No	Intermediate	pT1N0M0	FTC	100	51.57	84.01	NA	WT
	550	yes	no	139.41	<55	No	Low	pT2N0M0	miFTC	89.85	14.33	63.1	NA	WT
	551	yes	yes	8.98361	≥55	No	High	pT4BN1BM0	HCC	36.62	53.04	5.57	NA	WT
	583	yes	no	141.508	≥55	No	Intermediate	pT2N1AM0	PTC-classic variant	74.06	47.08	73.78	V600E	WT
	584	yes	no	88.5574	<55	No	Intermediate	pT3N1AM0	PTC-classic variant	91.17	0	77.58	WT	WT
	585	no	yes	33.9016	<55	Yes	Intermediate	pT3N1AM0	PTC-classic variant	73.17	44.8	78.05	V600E	NA
	586	yes	no	135.279	<55	No	Low	pT1N0M0	PTC-classic variant	66.25	44.06	100	V600E	WT
	591	no	no	146.066	<55	No	Low	pT2N0M0	miHCC	74.67	32.16	NA	NA	WT
	636	no	yes	55.8361	<55	No	Intermediate	pT3N0M0	PTC-follicular variant	NA	68.71	NA	WT	WT
	4810	yes	no	62.1311	<55	Yes	High	pT4N1AM0	PTC-classic variant	76.98	44.51	NA	WT	WT
	4837	no	yes	127.377	<55	Yes	Low	pT1N0M0	PTC-classic variant	78.78	40.68	48.93	V600E	WT
	4876	no	no	124.721	<55	Yes	Intermediate	pT3N0M0	PTC-classic variant	NA	13.61	23.34	V600E	WT
	4927	no	no	132.754	<55	Yes	Low	pT1N0M0	PTC-classic variant	73.07	23.52	71.47	V600E	WT
	4933	no	no	119.541	<55	Yes	Low	pT1N0M0	PTC-classic variant	61.68	22.73	79.77	V600E	WT
	4974	no	no	145.148	<55	Yes	Low	pT1N0M0	PTC-follicular variant	86.52	33.55	71.98	WT	WT
	4987	no	no	136.984	≥55	No	Low	pT1N0M0	PTC-classic variant	100	31.77	NA	WT	WT
	*methylation percentage observed by bisulfite pyrosequencing (bold= values above the median); WT: Wild type; PTC: Papillary Thyroid Carcinoma; FTC: Follicular Thyroid Carcinoma; HCC: Hurthle Cell Carcinoma; mi: minimally invasive; #according to American Thyroid Association recurrence risk stratification4.
