# Supplementary material for: PFKFB2 Promoter Hypomethylation as Recurrence Predictive Marker in Well-Differentiated Thyroid Carcinomas
Source: Int J Mol Sci. 2019 Mar 16;20(6):1334. doi: 10.3390/ijms20061334 (PMC6471408; doi:10.3390/ijms20061334)
Supplement: Supplementary file 1 [file ijms-20-01334-s001.zip › Supplementary Table 2.xlsx]

## Sheet: Tab S2
		Table S2. Delta beta (WDTC-PP - WDTC-GP) and AUC of the 21 probes obtained from the methylation microarray analysis (internal and TCGA databases) in the previous study (Bisarro dos Reis et al. 2017).
		Gene	Probe ID	Internal dataset			TCGA dataset
				Δβ	AUC		Δβ	AUC
		ATP6V0C	cg05884711*	0.191	0.841		0.123	0.646
		LAIR2	cg08905487#	-0.134	0.807		-0.151	0.769
		PFKFB2	cg02710090*	-0.109	0.797		-0.114	0.667
		CXXC5	cg19628988*	-0.104	0.677		-0.123	0.621
		GPR21	cg14115756	0.117	0.667		0.188	0.747
		DCD	cg01687040	-0.103	0.651		-0.21	0.757
		THSD7B	cg08231096	-0.101	0.648		-0.2	0.72
		OR9G4	cg03178489	-0.104	0.638		-0.193	0.711
		OR6K2	cg00119186	-0.105	0.727		-0.074	0.551
		OR4K15	cg07531287	-0.112	0.786		-0.064	0.585
		NLRP11	cg25730098	-0.118	0.779		-0.055	0.548
		OR2M3	cg07598464	-0.131	0.768		-0.026	0.565
		OR52B2	cg21966764	-0.11	0.727		-0.061	0.579
		OR2T6	cg06846214	-0.109	0.727		-0.032	0.579
		FFAR2	cg20199836	-0.102	0.721		-0.037	0.582
		RTN3	cg17372806	-0.103	0.698		-0.076	0.558
		OR52M1	cg03316101	-0.123	0.69		-0.041	0.612
		ADGRE2	cg04103514	-0.122	0.716		-0.081	0.613
		HRH1	cg06457736	-0.12	0.708		-0.005	0.519
		MBP	cg03560685	0.109	0.716		0.079	0.606
		YPEL4	cg22705929	0.122	0.74		0.032	0.513
		AUC: area under the ROC curve; Δβ: delta of the mean methylation values (beta) from PP and GP samples; Bold: probes confirmed in the TCGA database (Δβ>|0.1|);*probes selected for bisulfite pyrosequencing analysis; #designed PCR assays failed to proper amplify the region represented by this probe before pyrosequencing.
